# Supplementary material for: Self-assembly of PEGylated tetra-phenylalanine derivatives: structural insights from solution and solid state studies
Source: PubMed Central journal article supplement (PMC4879547; doi:10.1038/srep26638), 2016-05-25

## Supporting Information

### **Self-assembly of PEGylated tetra-phenylalanine derivatives: structural insights from solution and solid state studies**

Carlo Diaferia,<sup>1,2</sup> Flavia Anna Mercurio,<sup>2</sup> Cinzia Giannini,<sup>3</sup> Teresa Sibillano,<sup>3</sup> Giancarlo Morelli,<sup>1,2</sup>  
Marilisa Leone,<sup>2</sup> Antonella Accardo<sup>1,2</sup>

<sup>1</sup>Department of Pharmacy, University of Naples “Federico II” and Interuniversity Research Centre on Bioactive Peptides (CIRPeB), via Mezzocannone 16, 80134 Napoli (Italy)

<sup>2</sup>Institute of Biostructure and Bioimaging (IBB), CNR, via Mezzocannone 16, 80134 Napoli (Italy)

<sup>3</sup>Institute of Crystallography (IC), CNR, Via Amendola 122, 70126 Bari (Italy)

**Supporting Table S1.** <sup>1</sup>H chemical shifts (ppm) for DOTA-L<sub>6</sub>-F4 (0.45 mg/mL-340 μM) at 298 K and 600 MHz.

|      | HN                                                                                                                                                       | H $\alpha$ | H $\beta$ | Aromatic H                           |
|------|----------------------------------------------------------------------------------------------------------------------------------------------------------|------------|-----------|--------------------------------------|
| F1   | 8.05                                                                                                                                                     | 4.50       | 2.91-2.83 | H $\delta$ 7.14<br>H $\epsilon$ 7.30 |
| F2   | 7.99                                                                                                                                                     | 4.47       | 2.88-2.80 | H $\delta$ 7.09<br>H $\epsilon$ 7.27 |
| F3   | 7.95                                                                                                                                                     | 4.46       | 2.92-2.88 | H $\delta$ 7.15<br>H $\epsilon$ 7.31 |
| F4   | 7.99                                                                                                                                                     | 4.46       | 2.90-3.09 | H $\delta$ 7.26<br>H $\epsilon$ 7.34 |
| L6   | NHCOCH $2$ 2.42<br>NHCOCH $2$ CH $2$ 3.61<br>NHCH $2$ CH $2$ 3.58, 3.34<br><b>NHCH<math>2</math>CH<math>2</math></b> 8.01<br>OCH $2$ CH $2$ O 3.52, 3.55 |            |           |                                      |
| DOTA | 3.78, 3.45, 3.38, 3.09, 3.03                                                                                                                             |            |           |                                      |

**Supporting Figure S1.** Secondary structure by chemical shift analysis. Chemical shifts deviations of H $\alpha$  protons from random coil values  $\Delta\delta_{H\alpha} = \delta_{H\alpha\text{observed}} - \delta_{H\alpha\text{random-coil}}$

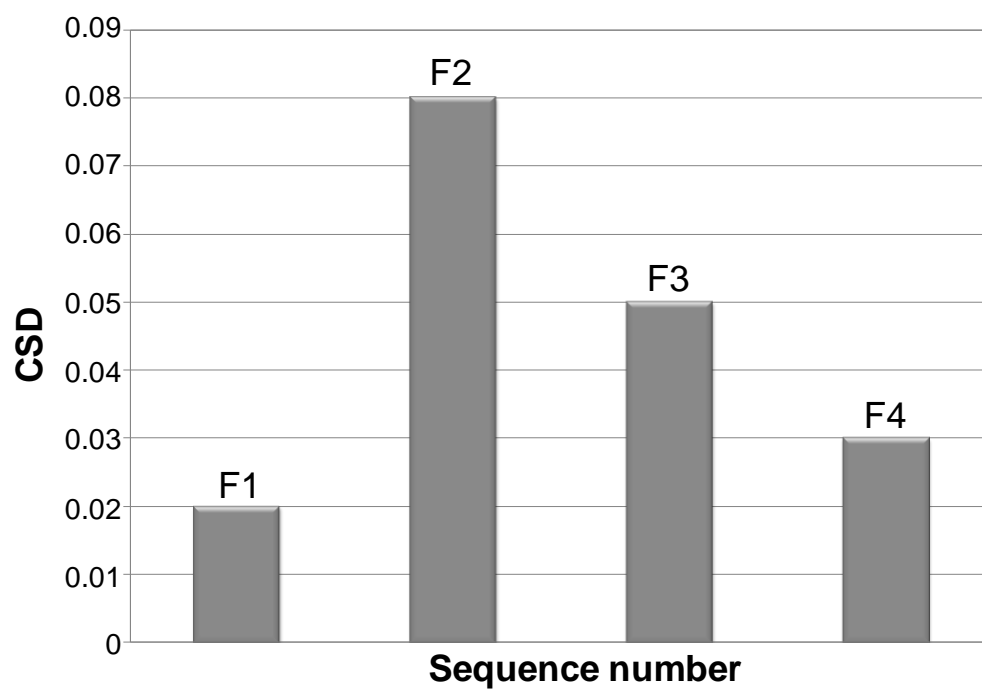

**Supporting Figure S2.** Comparison of 2D [ $^1\text{H}$ ,  $^1\text{H}$ ] TOCSY spectra of L<sub>6</sub>-F4 (0.15 mM concentration) (A) and DOTA-L<sub>6</sub>-F4 (0.1 mM concentration) (B). The H<sub>N</sub>-high field correlation region is shown; in panel (B) an additional amide H<sub>N</sub> spin system (indicated by the red arrow), belonging to the linker region L6, that connects the peptide portion to the DOTA ring, can be seen.

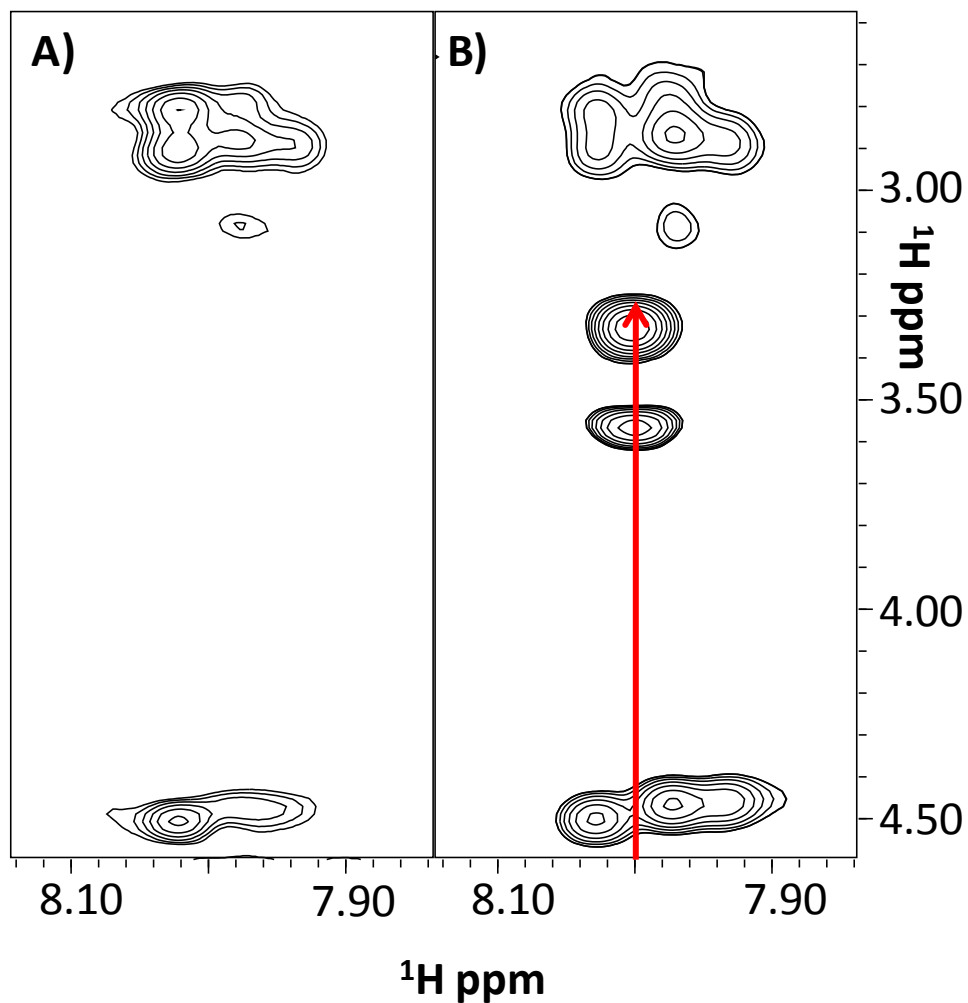

**Supporting Figure S3.** Intensity correlation functions for: A) DOTA-L<sub>6</sub>-F4 (□) and L<sub>6</sub>-F4 (■) in aqueous solutions at 1.5 mM concentration; B) L<sub>6</sub>-F4 in aqueous solutions at 2.0, 5.0 and 10 mg/mL that correspond to 2.23, 5.58 and 11.2 mM, respectively

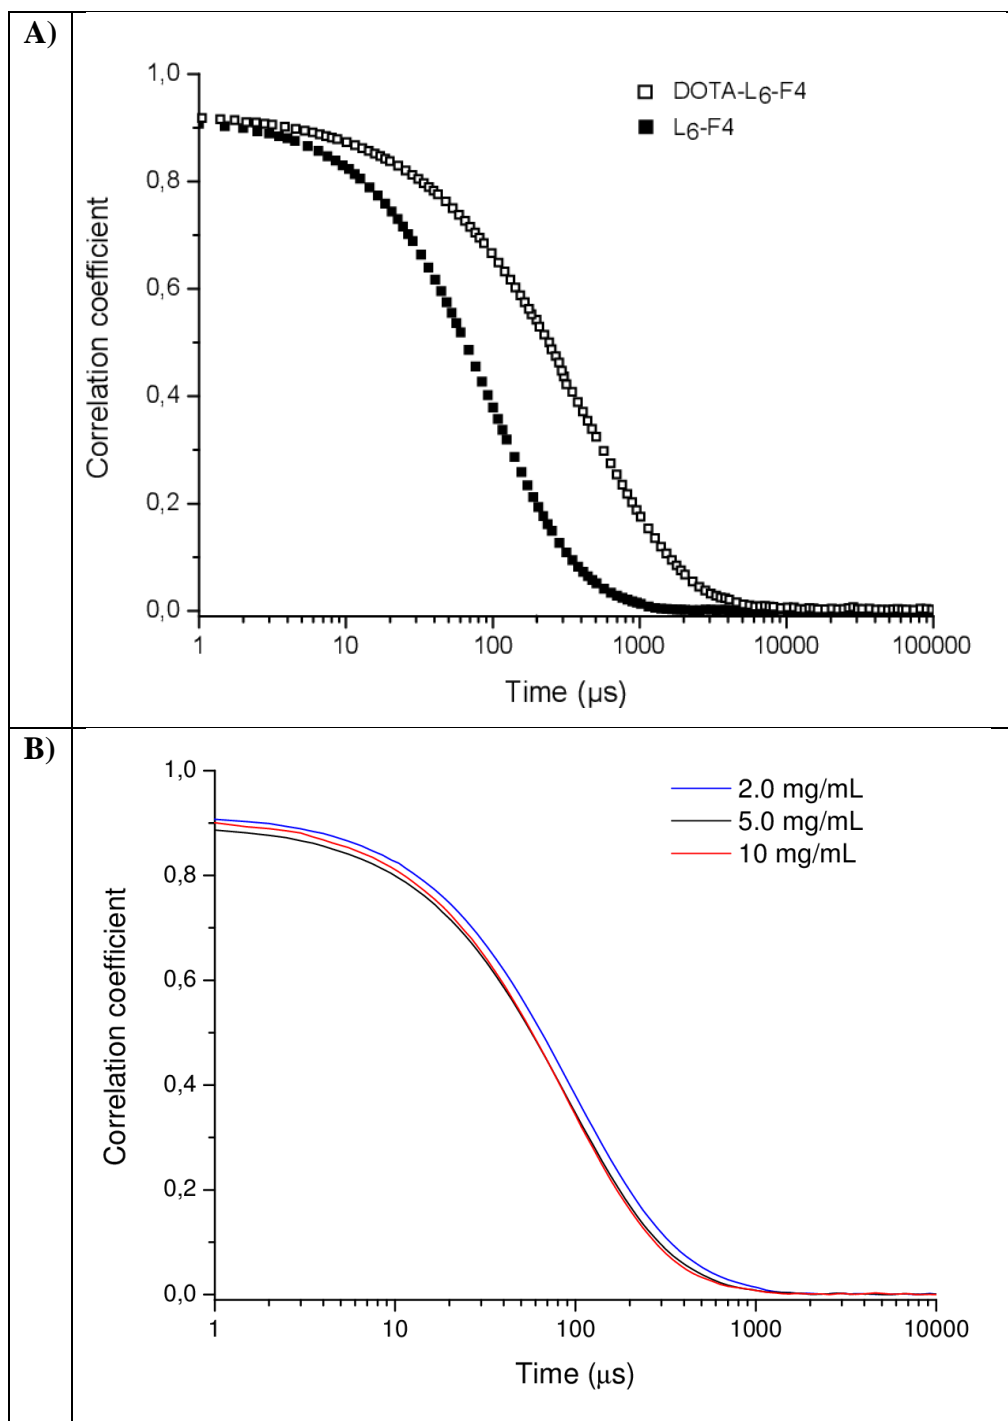

**Supporting Figure S4.** Simulations of 2D fiber diffraction patterns, computed for increasing fiber disorder: 0.1 rad ( $5.7^\circ$ ) in (A), 0.2 rad ( $11.4^\circ$ ) in (B), 0.5 rad ( $28.6^\circ$ ) in (C) and 0.75 rad ( $43^\circ$ ) in (D).

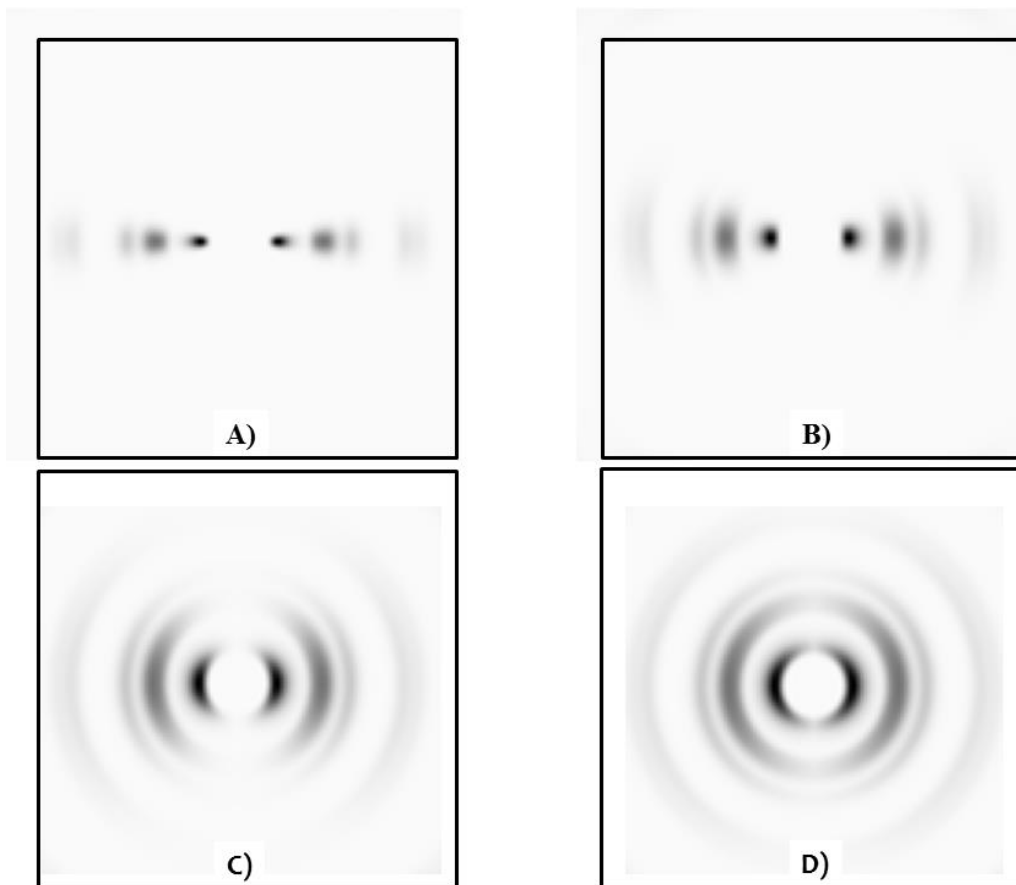

**Supporting Figure S5.** 2D SAXS data of L<sub>6</sub>-F4 (A) and DOTA-L<sub>6</sub>-F4 (B) dried fibers. 1D patterns of L<sub>6</sub>-F4 (C) and DOTA-L<sub>6</sub>-F4 (D).

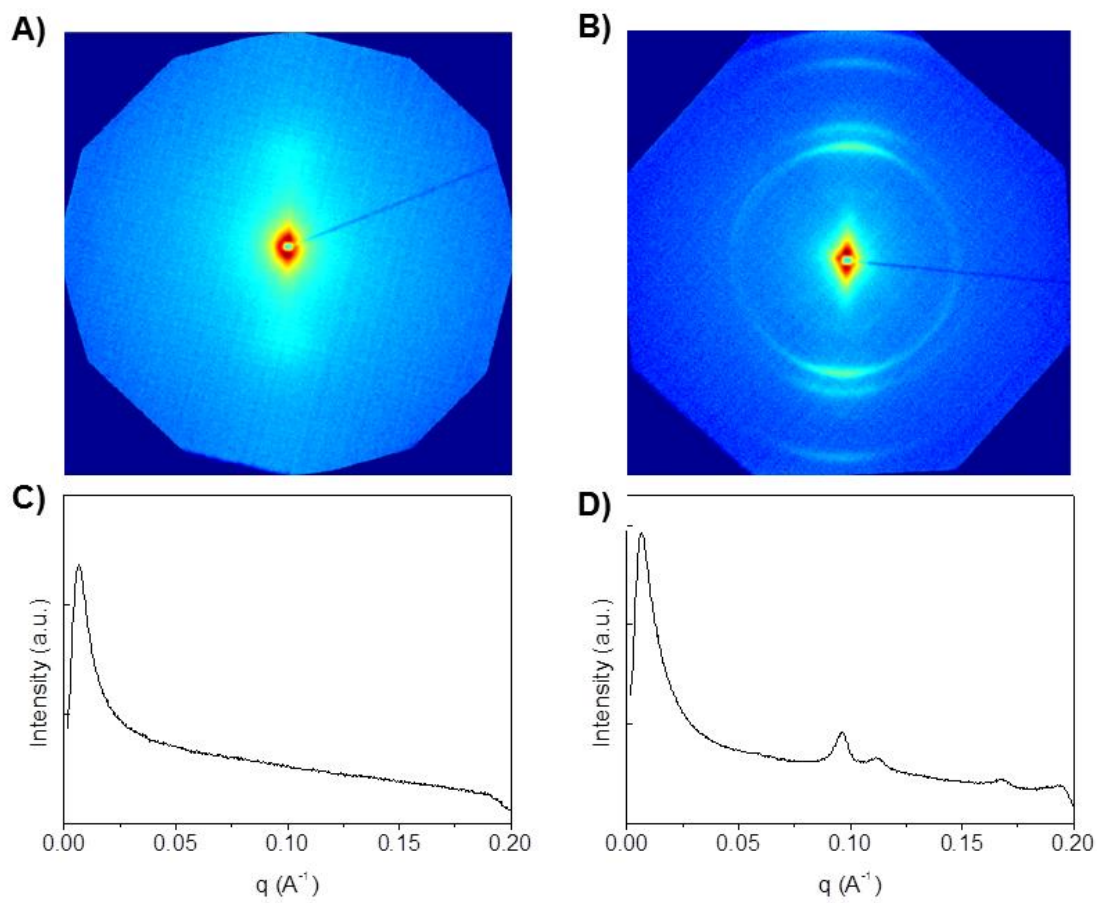

Supplement: srep26638-s1.pdf [file srep26638-s1.pdf]
